# Supplementary material for: Exploring the first aerosol indirect effect over Southeast Asia using a 10-year collocated MODIS, CALIOP, and model dataset
Source: Copernicus journal article supplement (doi:10.5194/acp-18-12747-2018), 2018-09-04
Supplement: Supplementary file 1 [file acp-18-12747-2018-supplement.pdf]

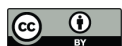

*Supplement of*

## **Exploring the first aerosol indirect effect over Southeast Asia using a 10-year collocated MODIS, CALIOP, and model dataset**

**Alexa D. Ross et al.**

*Correspondence to:* Alexa D. Ross ([alexa.ross@ssec.wisc.edu](mailto:alexa.ross@ssec.wisc.edu))

The copyright of individual parts of the supplement might differ from the CC BY 4.0 License.

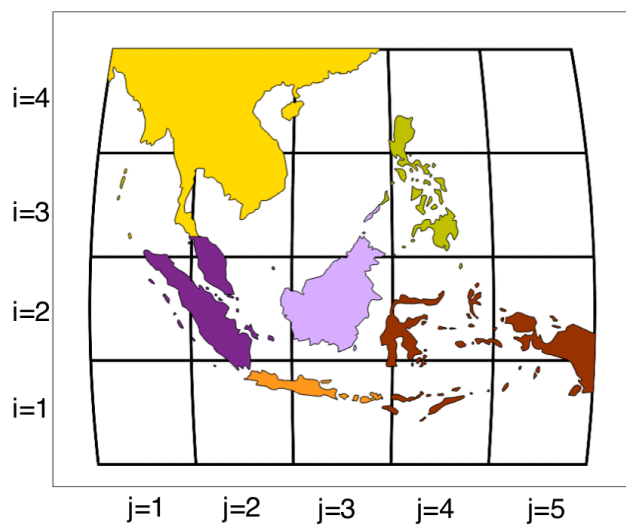

**Fig. S1.** Illustrated ocean grids and land regions. Each of the 20 ocean grids can be identified by an  $(i,j)$  coordinate.

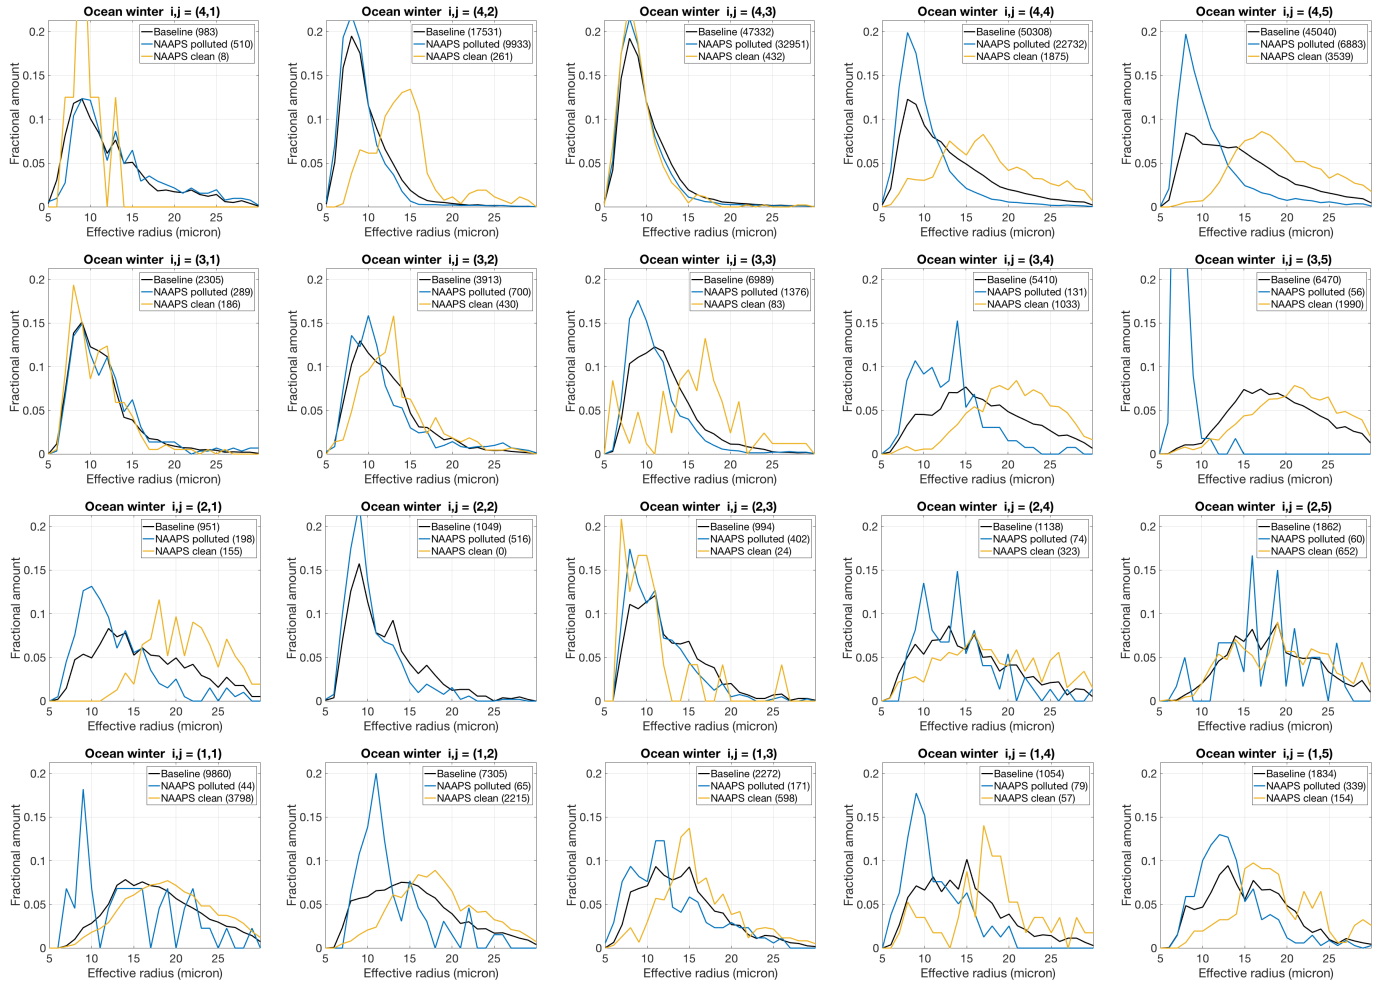

**Fig. S2.** Boreal winter normalized distributions of MODIS effective radius for 1-3 km ocean clouds. Distributions shown are for baseline, polluted, and clean data for twenty ocean regions.

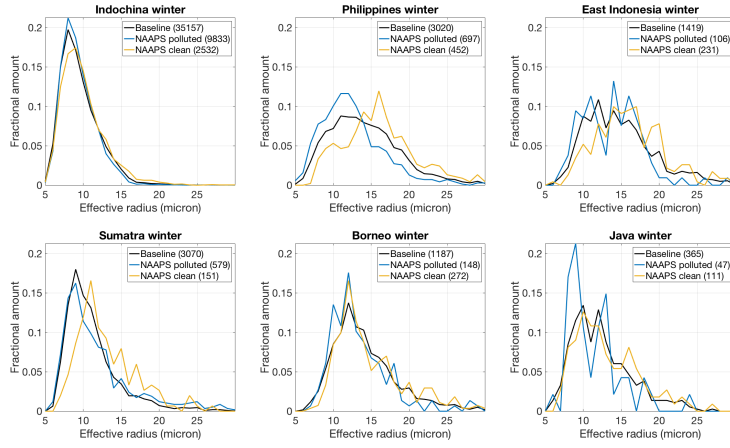

**Fig. S3.** Boreal winter normalized distributions of MODIS effective radius for 1-3 km land clouds. Distributions shown are for baseline, polluted, and clean data for six land regions.

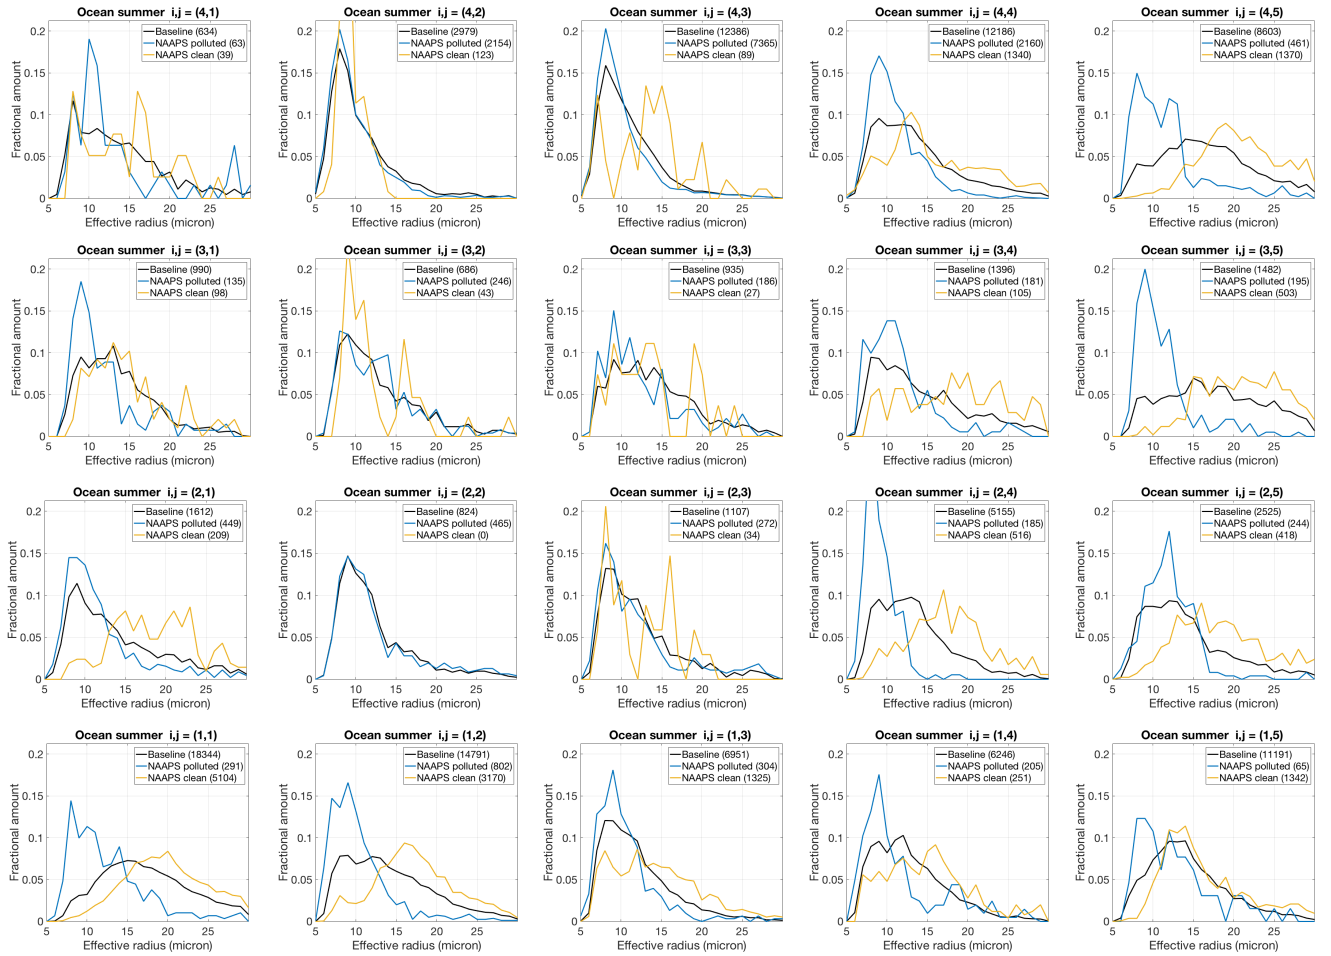

**Fig. S4.** Boreal summer normalized distributions of MODIS effective radius for 1-3 km ocean clouds. Distributions shown are for baseline, polluted, and clean data for twenty ocean regions.

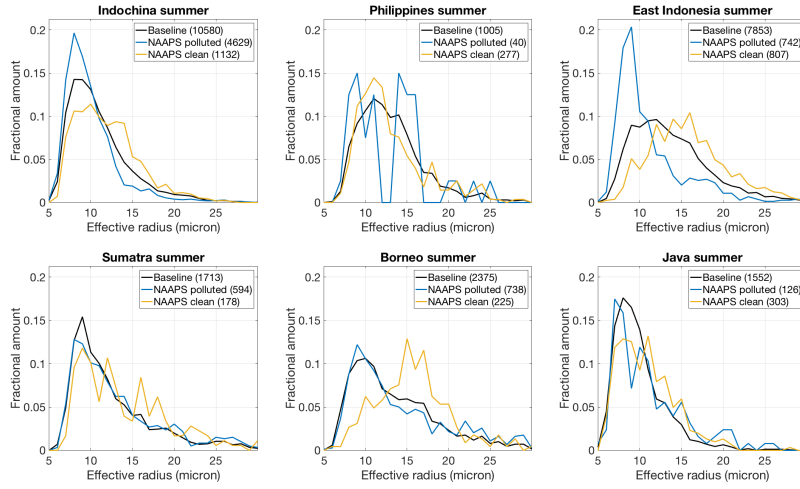

**Fig. S5.** Boreal summer normalized distributions of MODIS effective radius for 1-3 km land clouds. Distributions shown are for baseline, polluted, and clean data for six land regions.
